# Supplementary material for: In situ nanoarchitecturing of conjugated polyamide network-derived carbon cathodes toward high energy-power Zn-ion capacitors
Source: Royal Society of Chemistry journal article supplement (doi:10.1039/d1ta07350h), 2021-11-26
Supplement: d1ta07350h1.pdf [file d1ta07350h1.pdf]

## Electronic Supplementary Information

### ***In-situ* nanoarchitecturing of conjugated polyamide network-derived carbon cathodes toward high energy-power Zn-ion capacitors**

Xunwen Zheng,<sup>a,‡</sup> Ling Miao,<sup>a,‡</sup> Ziyang Song,<sup>a</sup> Wenyan Du,<sup>a</sup> Dazhang Zhu,<sup>a</sup> Yaokang Lv,<sup>c</sup>  
Liangchun Li,<sup>a</sup> Lihua Gan,<sup>a,\*</sup> Mingxian Liu<sup>a, b,\*</sup>

<sup>a</sup>*Shanghai Key Lab of Chemical Assessment and Sustainability, School of Chemical Science and Engineering, Tongji University, Shanghai 200092, P. R. China.*

<sup>b</sup>*College of Chemistry and Molecular Engineering, Zhengzhou University, Zhengzhou 450001, P. R. China.*

<sup>c</sup>*College of Chemical Engineering, Zhejiang University of Technology, Hangzhou 310014, P. R. China.*

#### **\*Corresponding Authors**

E-mail: [ganh@tongji.edu.cn](mailto:ganh@tongji.edu.cn) (Lihua Gan), [liumx@tongji.edu.cn](mailto:liumx@tongji.edu.cn) (Mingxian Liu).

<sup>‡</sup> These authors contributed equally to this work.

## Characterization

The morphological and elemental images are acquired using scanning electron microscopy (SEM, Hitachi S-4800) equipped with an X-ray energy dispersive spectroscopy (EDS) instrument. Fourier transformed infrared spectra (FT-IR) are conducted using a Thermo Nicolet NEXUS spectrometer. X-ray diffraction (XRD) patterns are obtained on a D8 Advance X-ray diffractometer (Cu K $\alpha$  radiation source  $\lambda = 0.154$  nm). Raman spectra are analyzed using a Renishaw Invia ( $\lambda_{\text{exc}} = 514$  nm). The nitrogen adsorption/desorption isotherms are analyzed on a Micromeritics ASAP 2460 apparatus at  $-196$  °C. The surface area is obtained by Braunauer–Emmett–Teller method. The pore size distribution is evaluated by the nonlocal density functional theory model. The surface functionality is acquired by an X-ray photoelectron spectrometer (XPS, AXIS Ultra DLD). Ultraviolet visible near infrared (UV-vis-NIR) spectra are conducted by an Agilent Carry 5000 spectrometer.

## Electrochemical Measurements

The working electrode is prepared by mixing the prepared carbon with carbon black and polytetrafluoroethylene binder with a weight ratio of 8:1:1 in ethanol. After drying at  $80$  °C overnight, the mixture is pressed on the stainless-steel mesh (mass loading of electroactive materials:  $\sim 10$  mg  $\text{cm}^{-2}$ ) under 20 MPa and then dried overnight at  $60$  °C. Zn-ion hybrid capacitors are assembled with the working electrodes as the cathode, Zn foil as the anode,  $3$  mol  $\text{L}^{-1}$  aqueous  $\text{Zn}(\text{CF}_3\text{SO}_3)_2$  solution as the electrolyte, and a glassy fibrous as the separator.

The cyclic voltammetry (CV) and electrochemical impedance spectroscopy (EIS) measurements are performed on a CHI660E electrochemical workstation. Galvanostatic charge/discharge (GCD) measurements are conducted on the CT3001A battery test system. All devices are tested within the

potential range from 0 to 1.8 V. The gravimetric capacitance ( $C_m$ , mA h g<sup>-1</sup>), energy density  $E$  (W h kg<sup>-1</sup>), and power density  $P$  (kW kg<sup>-1</sup>) of the devices are obtained from the following equations.

$$C_m = \frac{I \times \Delta t}{m} \quad (2)$$

$$E = C_m \times \Delta V \quad (3)$$

$$P = \frac{C_m \times \Delta V}{1000 \times \Delta t} \quad (4)$$

where  $I$  is the current density,  $\Delta t$  is the discharging time, and  $m$  is the mass of active material,  $\Delta V$  is the voltage window.

The ion diffusion coefficient ( $D$ , cm<sup>2</sup> s<sup>-1</sup>) is calculated according to the following equation.

$$D = \frac{R^2 T^2}{2A^2 C^2 F^4 n^4 \sigma^2} \quad (5)$$

where  $R$  (8.314 J mol<sup>-1</sup> K<sup>-1</sup>),  $T$  (293.15 K),  $A$  (m<sup>2</sup> g<sup>-1</sup>),  $C$  (mol L<sup>-1</sup>),  $F$  (96485 C mol<sup>-1</sup>),  $n$ ,  $\sigma$  ( $\Omega$  s<sup>-0.5</sup>) is gas constant, Kelvin temperature, the surface area of electrodes, molar concentration of electrolyte, Faraday constant, electron transfer numbers per molecule during electron reaction, and diffusive resistance, respectively.

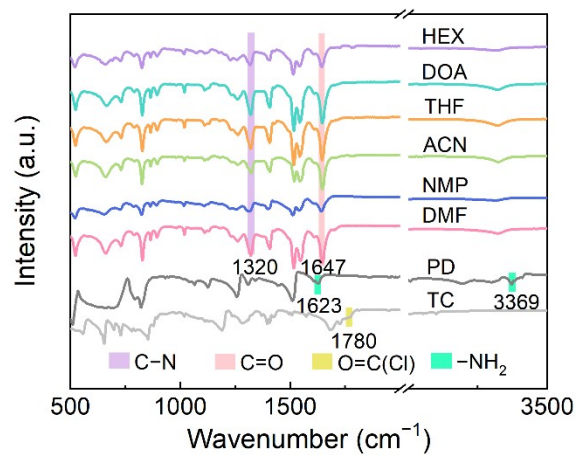

**Fig. S1** FT-IR spectra of monomers and polyamide precursors prepared by diverse solvents.

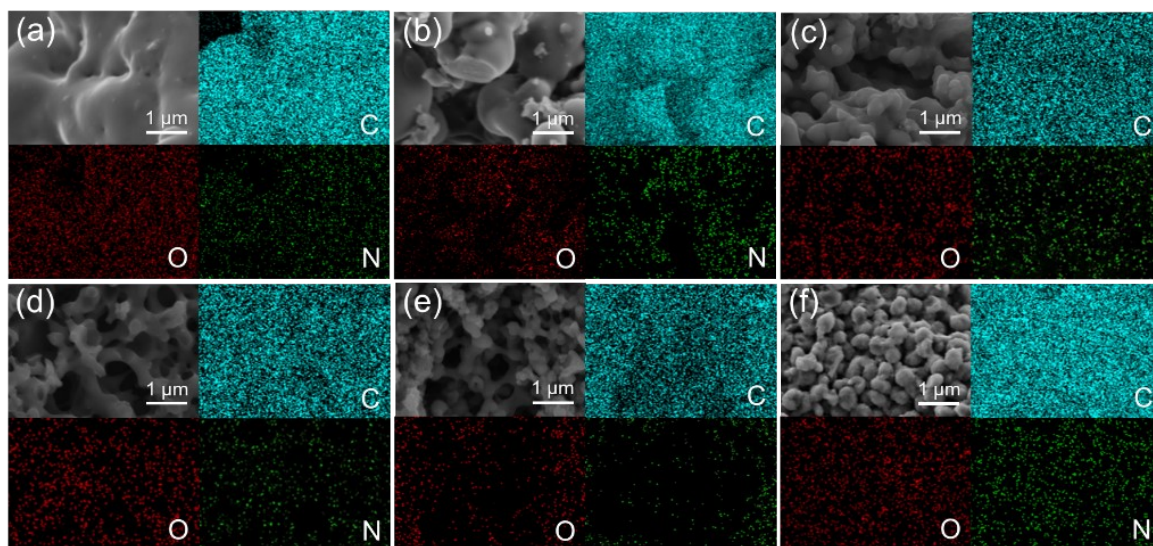

**Fig. S2** SEM images and the EDS mappings of (a)  $C_{\text{HEX}}$ , (b)  $C_{\text{DOA}}$ , (c)  $C_{\text{THF}}$ , (d)  $C_{\text{ACN}}$ , (e)  $C_{\text{NMP}}$ , and (f)  $C_{\text{DMF}}$ .

## Hansen Solubility Parameters Experiments

Hansen solubility parameters (HSPs) are estimated by a series of dispersibility experiments according to the literature.<sup>1-3</sup> Specifically, polyamide is added into ten common solvents with known HSPs and ultrasonicated for 1 h. Hereafter, the obtained dispersions are stabilized for one day, and the concentrations of the polyamide in the supernatant of the dispersions are then estimated by measuring the UV-vis absorption spectrum at 560 nm. Based on the concentration of the polyamide calculated by the Beer-Lambert-Bouguer law and observation of the swollen state and the sedimentation of polyamide in the suspension, the solvents with high reactivity to precursors own closer HSPs of the material than the solvents with low reactivity. Therefore, the three HSPs of polyamide are calculated by developing a three-dimensional model based on Hansen theory, where the ball center is the HSPs of the studied materials and the radius value ( $R_o$ ) presented the maximum difference in affinity allowed for a high interaction between solvent and material. Based on this method, the HSPs of polyamide are experimentally determined in Fig. 1h and the HSPs values of the polymer are estimated to be 25.8 MPa<sup>0.5</sup> (Table S1). The distance between the solvent and the material ( $R_a$ ) can be evaluated with Equation (1).

$$R_a^2 = 4(\delta_{D, \text{solu}} - \delta_{D, \text{solv}})^2 + (\delta_{P, \text{solu}} - \delta_{P, \text{solv}})^2 + (\delta_{H, \text{solu}} - \delta_{H, \text{solv}})^2 \quad (1)$$

where  $\delta_D$ ,  $\delta_P$ , and  $\delta_H$  refer to the dispersion, polar, and hydrogen parameters, respectively. The subscripts are “solu” for the studied solute material and “solv” for solvents.

**Table S1** Summary of HSPs between diverse solvents and the precursor.

| Solvent/Precursor              | $\delta_T$ | $\delta_D$ | $\delta_P$ | $\delta_H$ | Absorbance <sup>a</sup> | Polymerisation <sup>b</sup> | $R_a$ | RED | Data fit |
|--------------------------------|------------|------------|------------|------------|-------------------------|-----------------------------|-------|-----|----------|
| 1 Hexane                       | 14.9       | 14.9       | 0.0        | 0.0        | 0.007                   | ✓                           | 19.6  | 1.7 | 1        |
| 2 1,4-Dioxane                  | 20.5       | 19.0       | 1.8        | 7.4        | 0.155                   | ✓                           | 13.7  | 1.2 |          |
| 3 Tetrahydrofuran              | 19.5       | 16.8       | 5.7        | 8.0        | 1.797                   | ✓                           | 9.7   | 0.8 |          |
| 4 Acetonitrile                 | 24.4       | 15.3       | 18.0       | 6.1        | 2.575                   | ✓                           | 8.5   | 0.7 |          |
| 5 <i>N</i> -methyl pyrrolidone | 23.0       | 18.0       | 12.3       | 7.2        | 2.265                   | ✓                           | 5.4   | 0.5 |          |
| 6 Dimethyl formamide           | 24.9       | 17.4       | 13.7       | 11.3       | 2.702                   | ✓                           | 1.2   | 0.1 |          |
| 7 Isopropanol                  | 24.0       | 17.6       | 6.1        | 15.1       | 3.043                   | ×                           | –     | –   |          |
| 8 Dimethyl sulfoxide           | 26.7       | 18.4       | 16.4       | 10.2       | 2.431                   | ×                           | –     | –   |          |
| 9 Propylene carbonate          | 27.2       | 20.0       | 18.0       | 4.1        | 3.048                   | ×                           | –     | –   |          |
| 10 Methanol                    | 29.6       | 15.1       | 12.3       | 22.3       | 1.966                   | ×                           | –     | –   |          |
| Polyamide                      | 25.8       | 17.6       | 14.3       | 12.2       | –                       | –                           | –     | –   | –        |

<sup>a</sup>Measured absorbance at 560 nm.

<sup>b</sup>The first six solvents are selected as reaction media because the polymerization occurs in these systems.

**Table S2** Surface areas ( $S_{\text{BET}}$ ), micropore surface areas ( $S_{\text{micro}}$ ), total pore volumes ( $V_{\text{tol}}$ ), and chemical compositions of  $C_X$ .

| Sample           | $S_{\text{BET}}$ (m <sup>2</sup> g <sup>-1</sup> ) | $S_{\text{micro}}$ (m <sup>2</sup> g <sup>-1</sup> ) | $V_{\text{tol}}$ (cm <sup>3</sup> g <sup>-1</sup> ) | O (wt.%) | N (wt.%) |
|------------------|----------------------------------------------------|------------------------------------------------------|-----------------------------------------------------|----------|----------|
| $C_{\text{HEX}}$ | 942                                                | 798                                                  | 0.54                                                | 6.61     | 3.88     |
| $C_{\text{DOA}}$ | 1035                                               | 881                                                  | 0.61                                                | 6.70     | 4.35     |
| $C_{\text{THF}}$ | 1110                                               | 982                                                  | 0.62                                                | 7.58     | 4.85     |
| $C_{\text{ACN}}$ | 1223                                               | 1192                                                 | 0.62                                                | 9.14     | 5.76     |
| $C_{\text{NMP}}$ | 1486                                               | 1466                                                 | 0.63                                                | 9.04     | 6.12     |
| $C_{\text{DMF}}$ | 1656                                               | 1634                                                 | 0.71                                                | 8.48     | 7.29     |

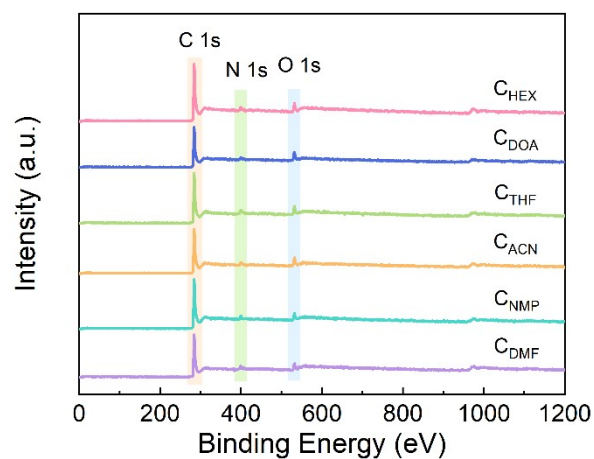

**Fig. S3** XPS spectra of  $C_X$ .

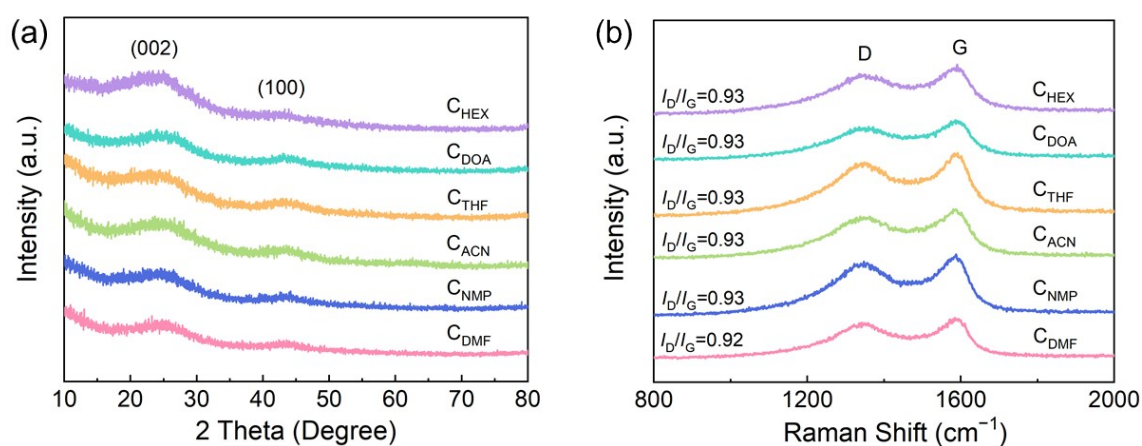

**Fig. S4** XRD pattern and Raman spectra of  $C_X$ .

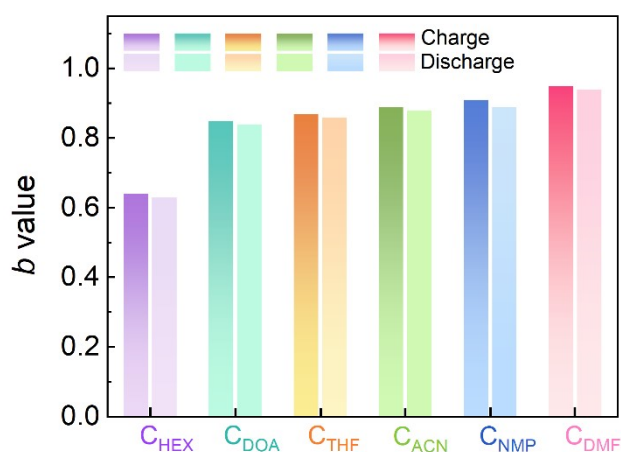

**Fig. S5** The  $b$  values of  $C_X$ -based devices in the anodic and cathodic scans from 5 to 500  $\text{mV s}^{-1}$ .

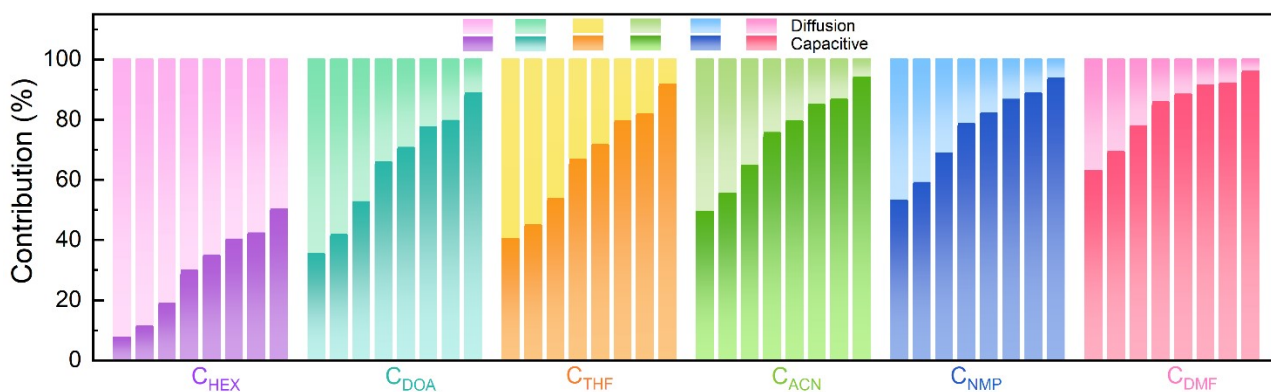

**Fig. S6** Capacitive and diffusion-controlled contribution ratios of  $C_X$ -based devices at 5, 10, 50, 100, 200, 300, 400, and 500  $\text{mV s}^{-1}$ .

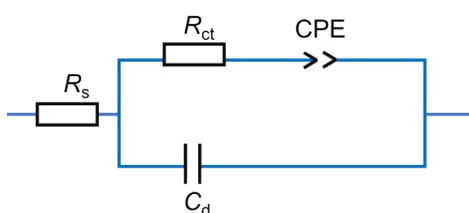

**Fig. S7** The equivalent circuit of Nyquist plots. ( $R_s$ : internal resistance of the electrode,  $R_{ct}$ : charge transfer resistance, CPE: constant phase angle element,  $C_d$ : electrical double layer capacitor).

**Table S3** The comparison of parameters related to charge transfer of  $C_X$ .

| Device           | $R_s$ ( $\Omega$ ) | $R_{ct}$ ( $\Omega$ ) | $\sigma$ ( $\Omega \text{ s}^{-0.5}$ ) |
|------------------|--------------------|-----------------------|----------------------------------------|
| $C_{\text{HEX}}$ | 0.65               | 119.74                | 201.89                                 |
| $C_{\text{DOA}}$ | 0.65               | 110.68                | 224.37                                 |
| $C_{\text{THF}}$ | 0.99               | 110.41                | 185.03                                 |
| $C_{\text{ACN}}$ | 0.87               | 80.34                 | 69.34                                  |
| $C_{\text{NMP}}$ | 0.87               | 11.06                 | 40.61                                  |
| $C_{\text{DMF}}$ | 0.63               | 10.47                 | 17.48                                  |



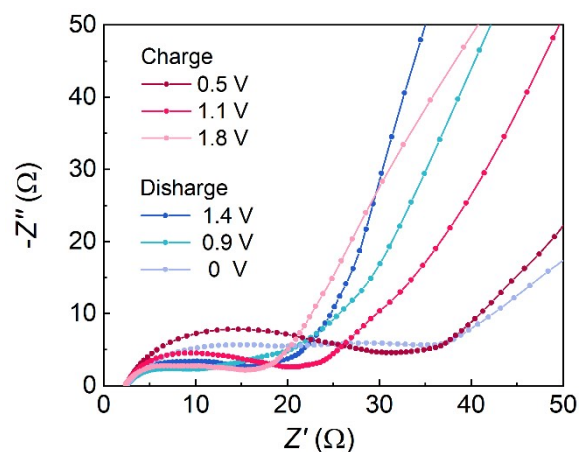

**Fig. S8** Nyquist plots of the  $C_{\text{DMF}}$ -based device measured at different potentials.

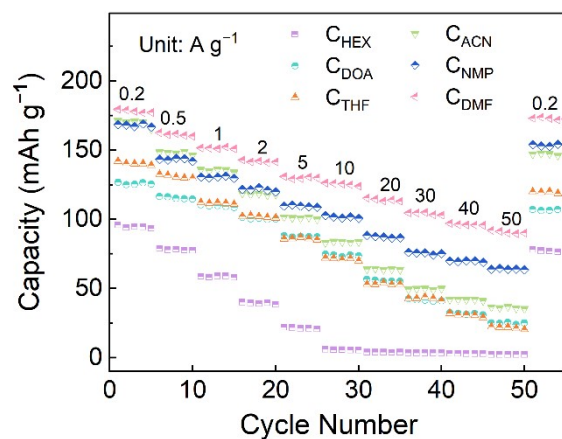

**Fig. S9** Capacity reversibility measurements.

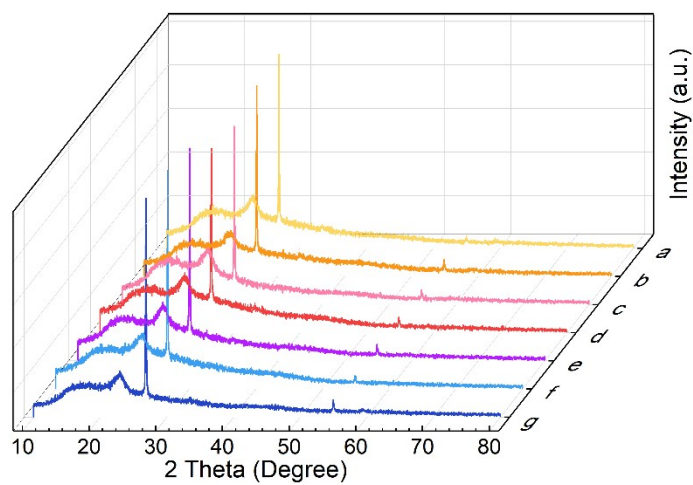

**Fig. S10** *Ex situ* XRD patterns of the  $C_{\text{DMF}}$ -based device during the charging/discharging processes.

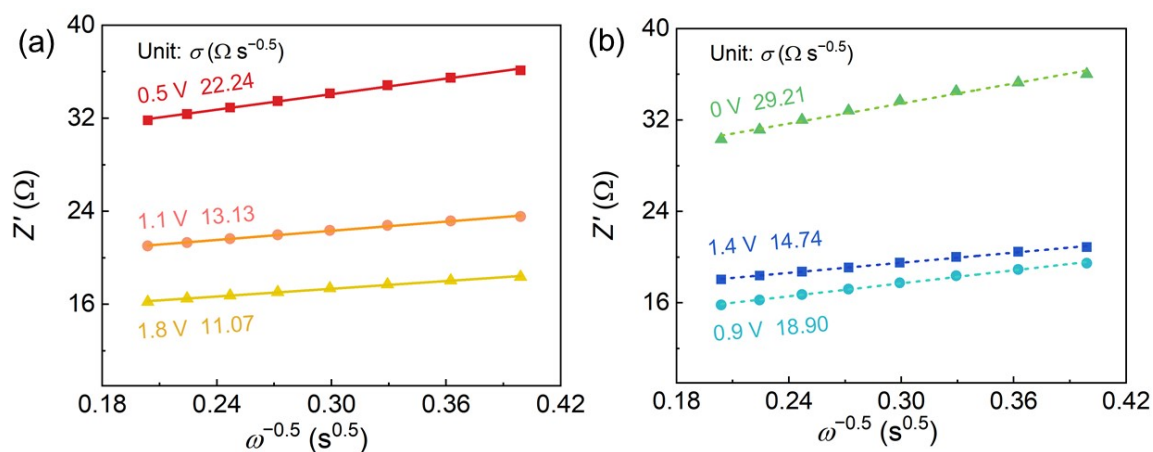

**Fig. S11** The linear relation of  $\omega^{-0.5}$  versus  $Z'$  at (a) charging conditions and (b) discharging conditions.

**Table S4** The fitted  $\sigma$  values and  $D_{Zn^{2+}}$  of the  $C_{DMF}$ -based device at various potentials.

| Potential (V) | $\sigma$ ( $\Omega s^{-0.5}$ ) | $D_{Zn^{2+}} \times 10^{-18}$ ( $cm^2 s^{-1}$ ) |
|---------------|--------------------------------|-------------------------------------------------|
| 0.5           | 22.24                          | 3.25                                            |
| 1.1           | 13.13                          | 9.33                                            |
| 1.8           | 11.07                          | 13.10                                           |
| 1.4           | 14.74                          | 7.40                                            |
| 0.9           | 18.90                          | 4.50                                            |
| 0             | 29.21                          | 1.89                                            |

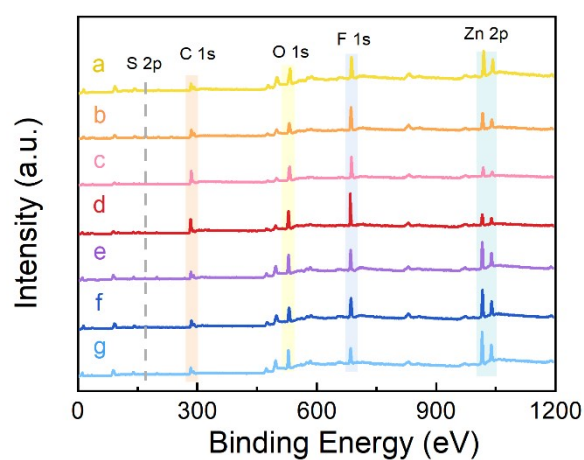

**Fig. S12** *Ex situ* XPS spectra at various charging/discharging processes of  $C_{DMF}$  device.

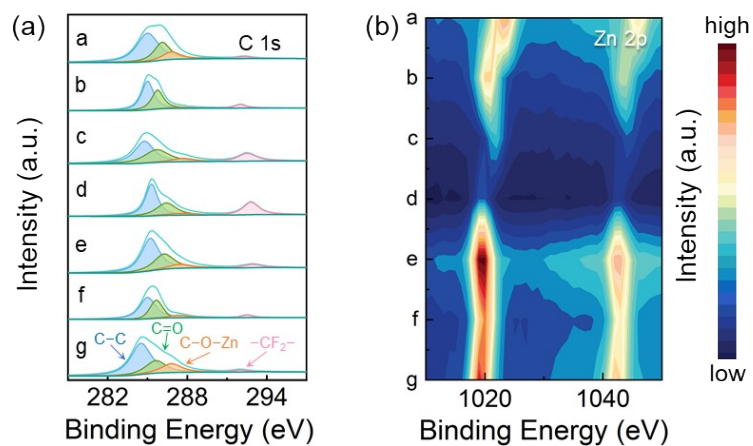

**Fig. S13** (a) The C 1s and (b) Zn 2p XPS spectra at various charging/discharging processes of the  $C_{DMF}$ -based device.

## References

- 1 H. Launay, C. M. Hansen and K. Almdal, *Carbon*, 2007, **45**, 2859–2865.
- 2 S. Chen, D. M. Koshy, Y. Tsao, R. Pfattner, X. Yan, D. Feng and Z. Bao, *J. Am. Chem. Soc.*, 2018, **140**, 10297–10304.
- 3 J. Chen, W. Yan, E. J. Townsend, J. Feng, L. Pan, V. Del Angel Hernandez and C. F. J. Faul, *Angew. Chem. Int. Ed.*, 2019, **58**, 11715–11719.
